# Supplementary material
Source: publisher figshare collection journal article supplement (https://sage.figshare.com/ndownloader/files/15342359)
Supplement: Supplementary file 1 [file 15342359]

# PICC History Sheet

Addressograph

Insertion date: \_\_\_\_\_

Reason for insertion:

SACT ☐ PA ☐ PN ☐ IVBX ☐ Cording ☐

Support therapy ☐ Infusion pain ☐

Reinsertion ☐ reason: \_\_\_\_\_

Diagnosis: \_\_\_\_\_

Cardiac Pacemaker: Y / N      Pacing / Demand

Atrial fibrillation: Y / N

H/O Thrombosis: Y / N \_\_\_\_\_

Anticoagulants: Y / N \_\_\_\_\_

Nickel Allergy: Y / N

Other Allergies:

Previous CVAD: Y / N \_\_\_\_\_

Reason for removal: \_\_\_\_\_

ACF: \_\_\_\_\_ cms

(R)      (L)

Basilic ☐ \_\_\_\_\_

Brachial ☐ \_\_\_\_\_

Cephalic ☐ \_\_\_\_\_

PICC cut at: \_\_\_\_\_ cms

Highest P wave at: \_\_\_\_\_ cms

Exit site marking at: \_\_\_\_\_ cms

Internal length: \_\_\_\_\_ cms

External length: \_\_\_\_\_ cms

Solo1 3CG ☐      Sherlock only ☐

Solo2 3CG ☐      Sherlock only ☐

Groshong 1 ☐      Midline ☐

Securacath ☐      Statlock ☐

Device asset number : 20010322 / 20011410

Lot no: \_\_\_\_\_

Problems encountered: Y / N

Difficulty cannulating ☐

Guidewire not threading ☐

PICC not threading ☐

Multiple malpositions ☐

Changed to other arm ☐

Additional details: \_\_\_\_\_

CXR Y / N \_\_\_\_\_

IS CXR review: \_\_\_\_\_

Radiologist report: \_\_\_\_\_

Placed by: \_\_\_\_\_

Assisted by: \_\_\_\_\_

Database completed on: \_\_\_\_\_

RISOH ☐
